# Supplementary material
Source: PubMed Central journal article supplement (PMC3304452)
Supplement: NIHMS359428-supplement-1_si_001.pdf [file NIHMS359428-supplement-1_si_001.pdf]

## Supporting information.

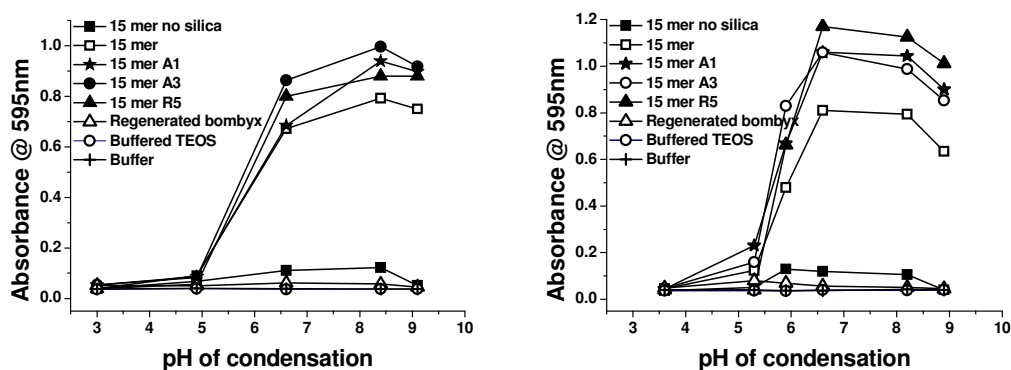

Figure 1. Buffer comparison for scattering data. LHS, phosphate buffer; RHS, bis propane/ citric acid buffer.

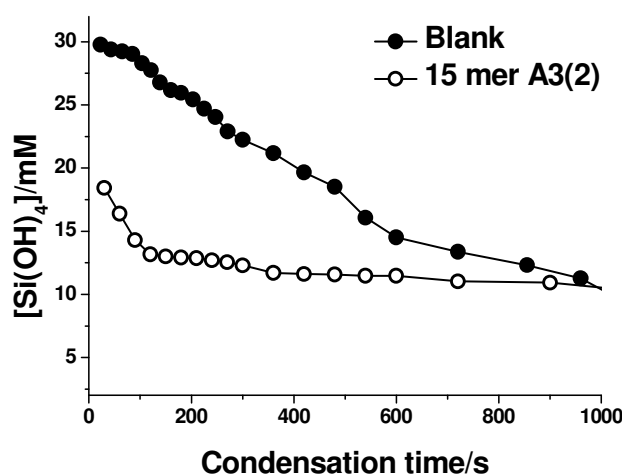

Figure 2. Disappearance of molybdenum active silicate species after initiation of condensation by pH adjustment to 6.9

### Equilibrium monosilicic acid concentrations:

For each reaction, the equilibrium point of the silica condensation reaction was determined as the time after which the level of monosilicic acid in the silicifying system was stabilised. Twenty  $\mu\text{l}$  of supernatant from each sample was added to 180  $\mu\text{l}$  of molybdic acid reagent (ammonium molybdate (20 g) dissolved in 500  $\text{cm}^3$  ddH<sub>2</sub>O, hydrochloric acid added (60  $\text{cm}^3$  concentrated) and diluted to 1000  $\text{cm}^3$  with ddH<sub>2</sub>O). Reducing reagent (oxalic acid (20 g), 4 methylaminophenolsulphate (6.67g) and sodium sulphite (4 g) dissolved in ddH<sub>2</sub>O (800  $\text{cm}^3$ ), Sulphuric acid added (98%, 100  $\text{cm}^3$ ) and diluted to 1,000  $\text{cm}^3$  with ddH<sub>2</sub>O) was added after 15 minutes and the absorbance at 810 nm measured after a minimum of 2 hours and maximum of 48 hours (corresponding to the completion of reduction and known stability of

the silicomolybdous acid complex formed). Measurements were compared with standards prepared by dilution of a 1,000 ppm SiO<sub>2</sub> stock standard treated in the same way.

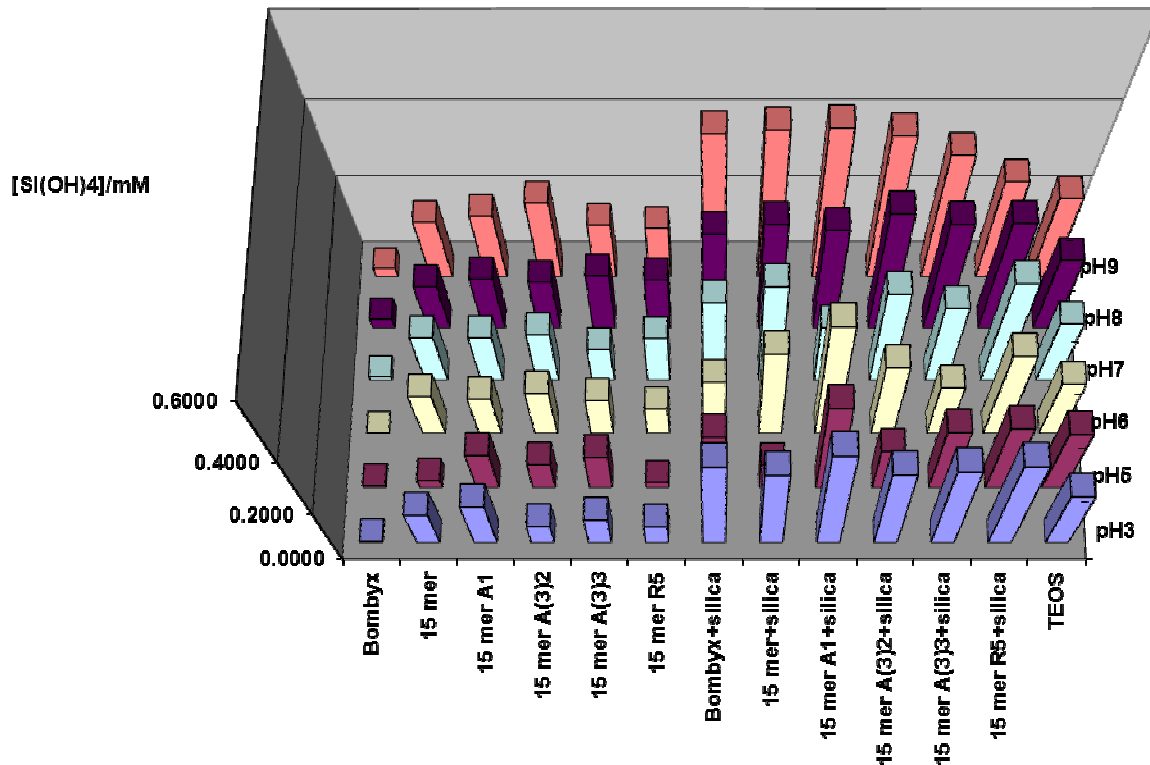

Figure 3 [Si(OH)<sub>4</sub>] at equilibrium/mM

### Residual soluble protein:

Determination of remaining soluble protein after silica condensation was carried out by a modified Bradford protein assay method. Coomassie blue stock reagent – 60µl (100 mg Coomassie blue in 50 cm<sup>3</sup> methanol with 100 cm<sup>3</sup> 85% orthophosphoric acid diluted to 200 cm<sup>3</sup> with water) was diluted with 130 µl distilled water and 10 µl of supernatant from each sample added (after centrifugation at 3000 rpm for 5 minutes). Absorbance at 595 and 450 nm measured using a labtech LT-5000 plate reader with manta software (build 0460). Protein determined as the ratio of the absorbances at 595 nm and 450 nm and measured against 0.1 – 1.0 mgcm<sup>-3</sup> aqueous solutions of non chimeric 15 mer and regenerated *B. mori* fibroin as standards for the residual 15 mer chimeras and *B. mori* proteins respectively.

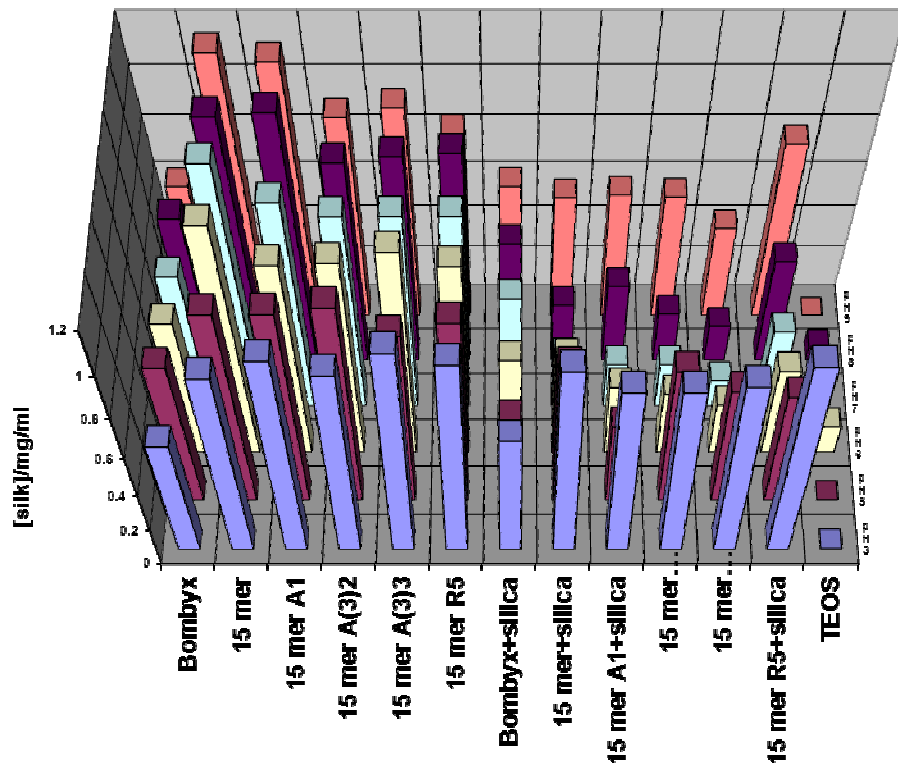

Figure 4. Aqueous protein at equilibrium time/mgcm<sup>-3</sup>

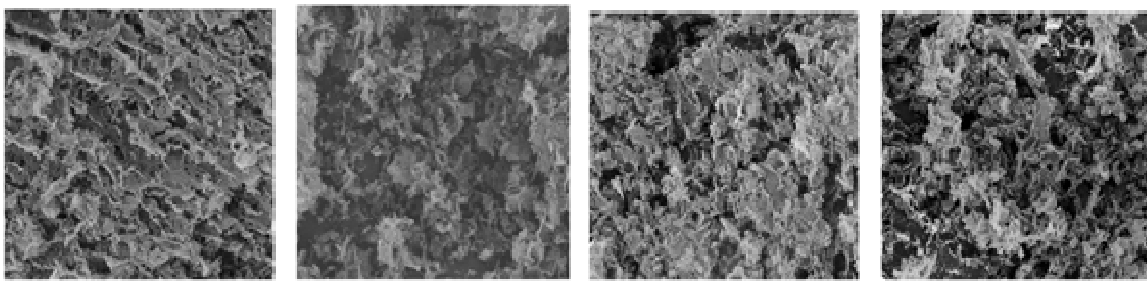

Figure 5. Precipitated silica blanks. Left to right pH 4.7, 6.7, 7.3 and 7.9. Scale bar represents 40µm

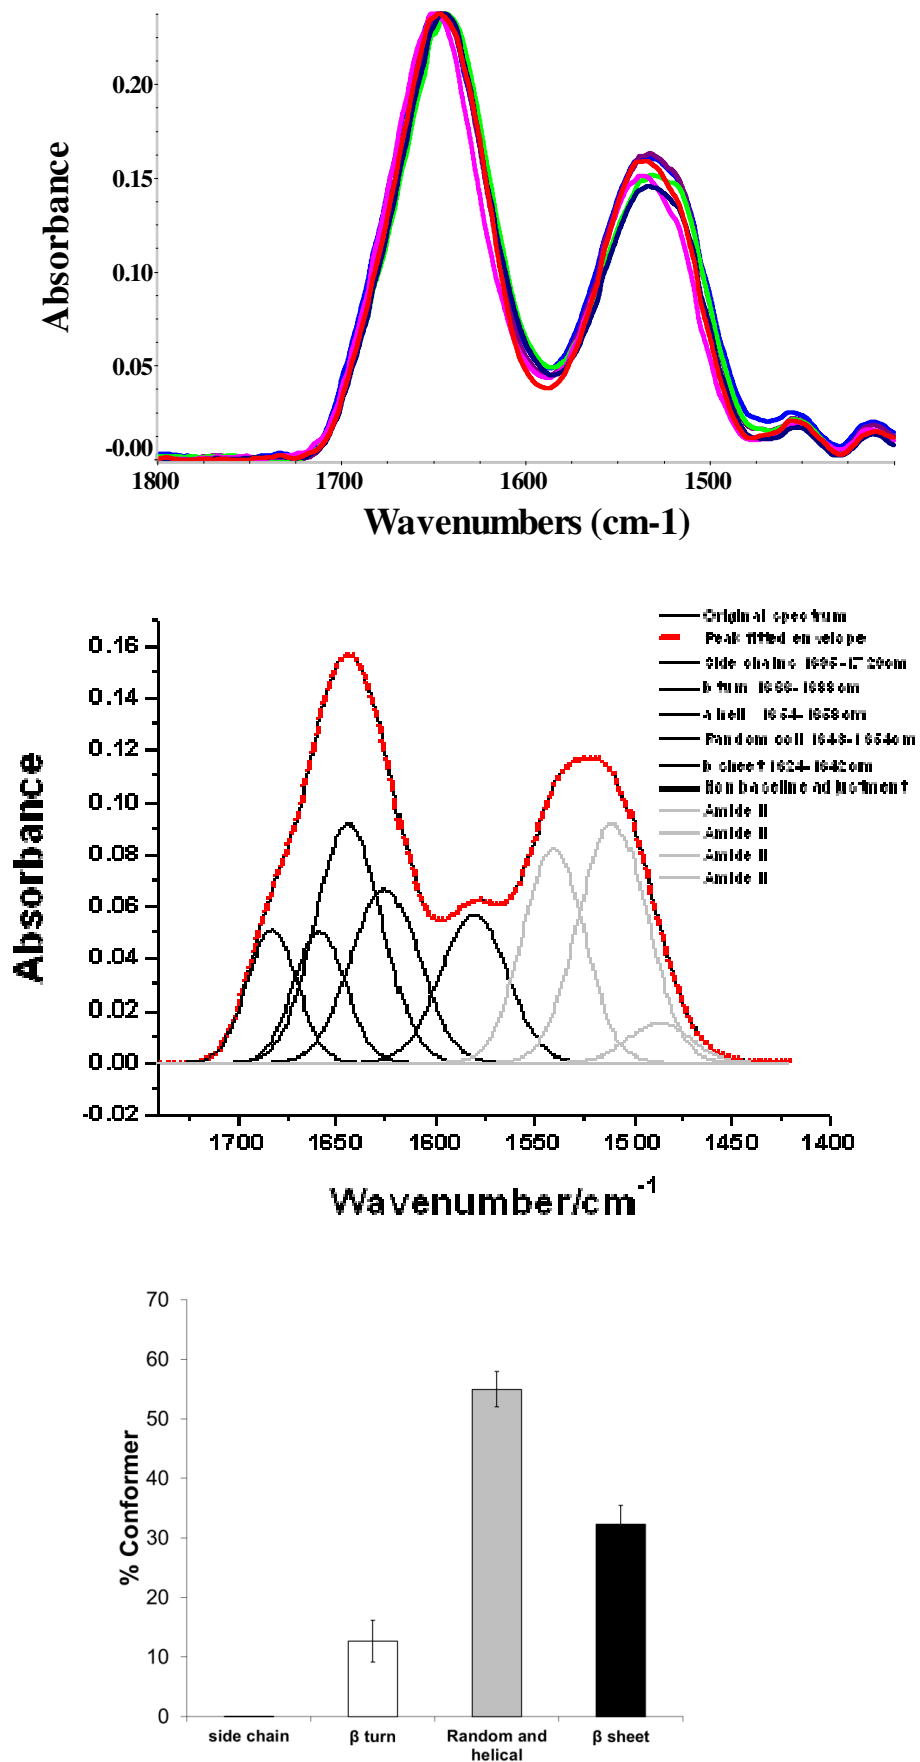

**Figure 6. Top-** representative FTIR of 15 mers. - Silk consensus repeats only, - A1 chimera, - A3 chimera, - R5 chimera. **Middle-** Example of amide I band curve fitting of standard  $\alpha$  lactalbumin. **Bottom-** Statistical analysis of 5 repeats (sampling, data collection and analysis) of  $\alpha$  lactalbumin.

| Silk/ chimera           | pH 3.1 | pH 4.7 | pH 6.7 | pH 7.4 | pH 7.8 | pH 8.7 |
|-------------------------|--------|--------|--------|--------|--------|--------|
| Silk fibroin            |        | X      | X      | X      | X      |        |
| 15mer                   |        | X s    | X s    | X s    | X      |        |
| 15mer-A1                | X      | X s    | X s    | X s    | X s    | X      |
| 15mer-A3                |        | X s    | X s    | X s    | X s    | X      |
| 15mer-(A3) <sub>2</sub> | X      | X s    | X s    | X s    | X s    | X      |
| 15mer-(A3) <sub>3</sub> | X      | X s    | X s    | X s    | X s    | X      |
| 15mer-R5                | X      | X s    | X s    | X s    | X s    | X      |

**Table 1. pH at which isolable material was recovered from silicifying systems**
